# Supplementary material for: Effects of the lateral amplitude and regularity of upper body fluctuation on step time variability evaluated using return map analysis
Source: PLOS journal article supplement (doi:10.1371/journal.pone.0180898), 2017-07-10
Supplement: S2 (10.1371/journal.pone.0180898.s002) [file journal.pone.0180898.s002]

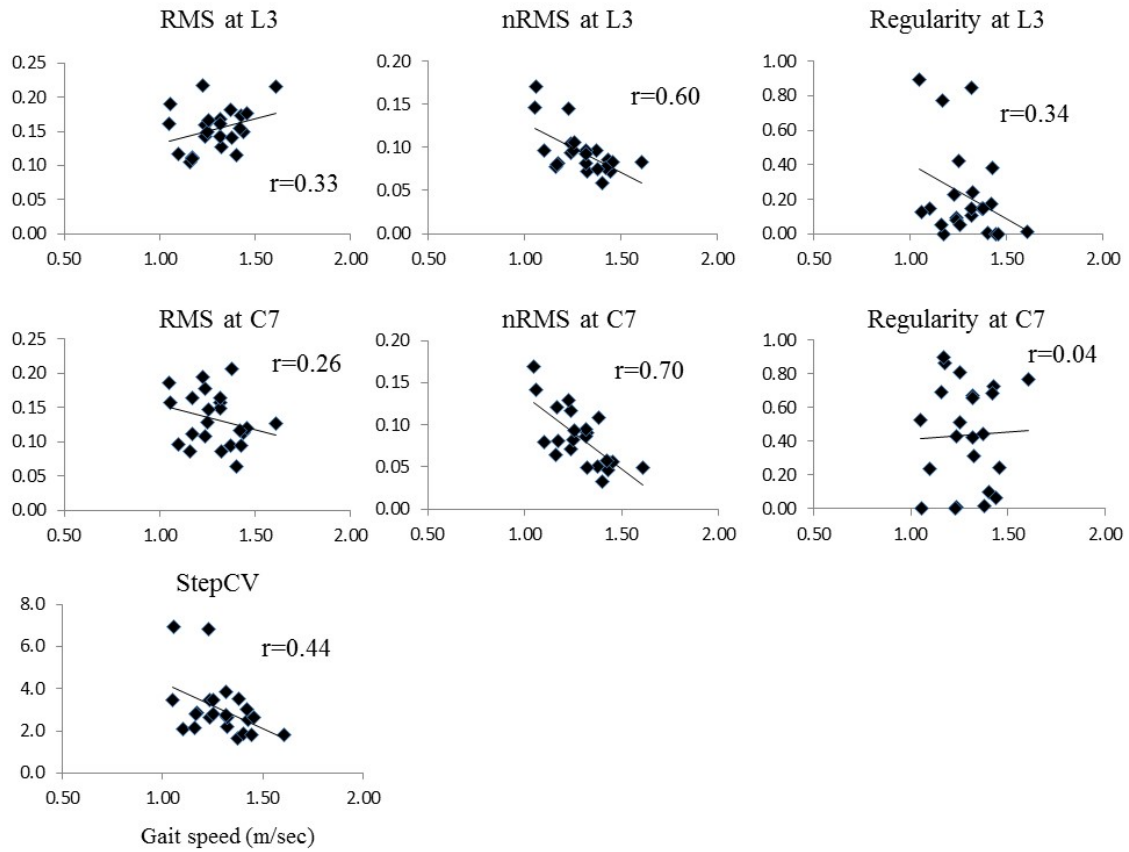

**Fig S2.**

Relationships of gait speed with RMS, nRMS, regularity, and step time variability (step CV) .
